# Supplementary material
Source: PubMed Central journal article supplement (PMC6773525)
Supplement: NIHMS1020845-supplement-Supp_info.pdf [file NIHMS1020845-supplement-Supp_info.pdf]

A

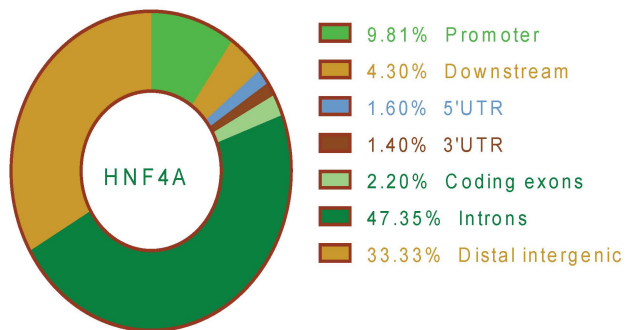

B

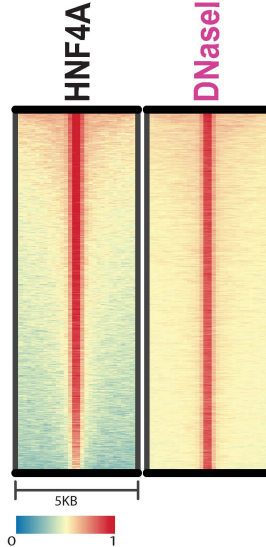

C

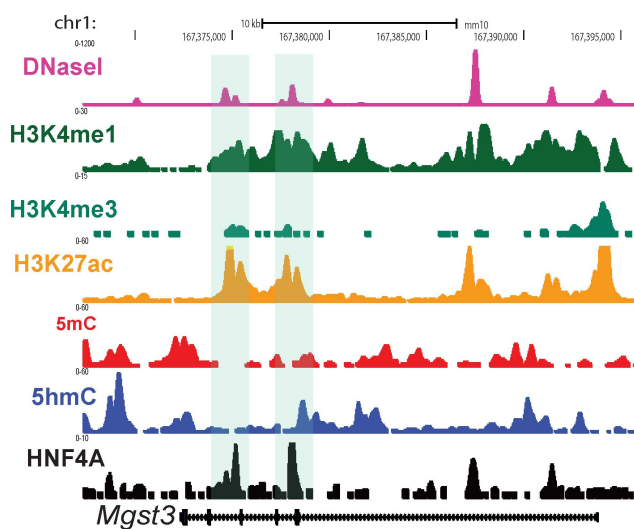

D

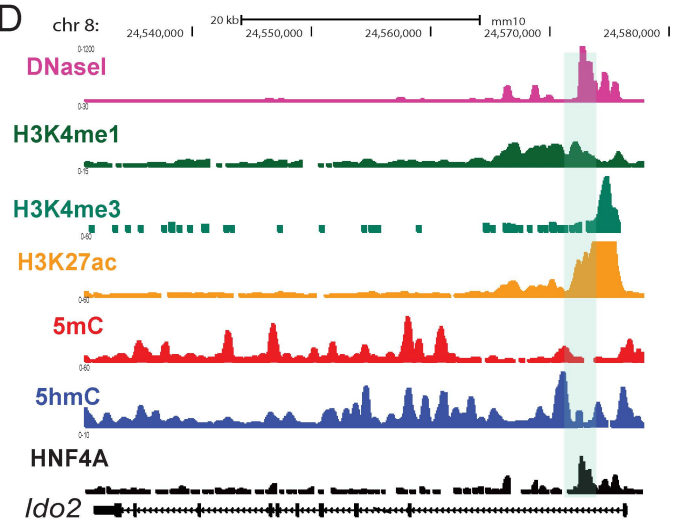

E

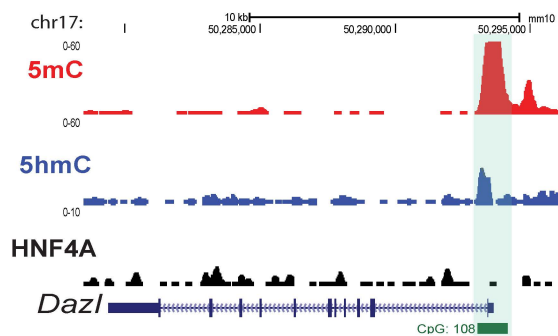

F

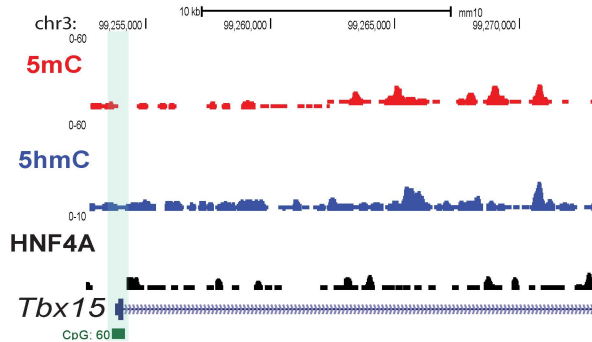

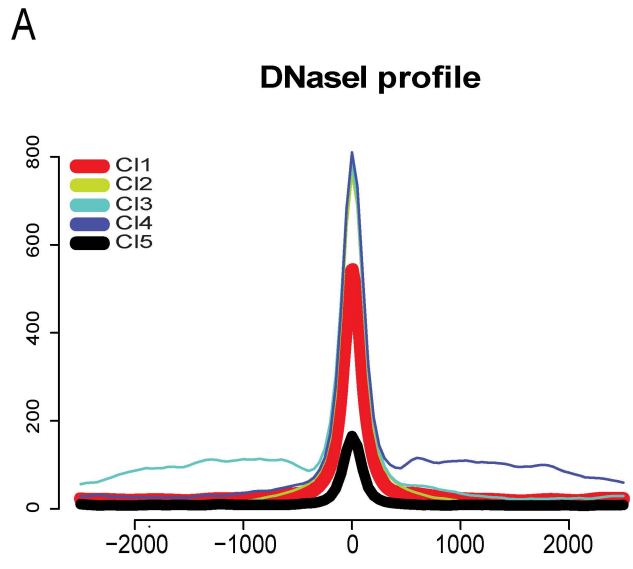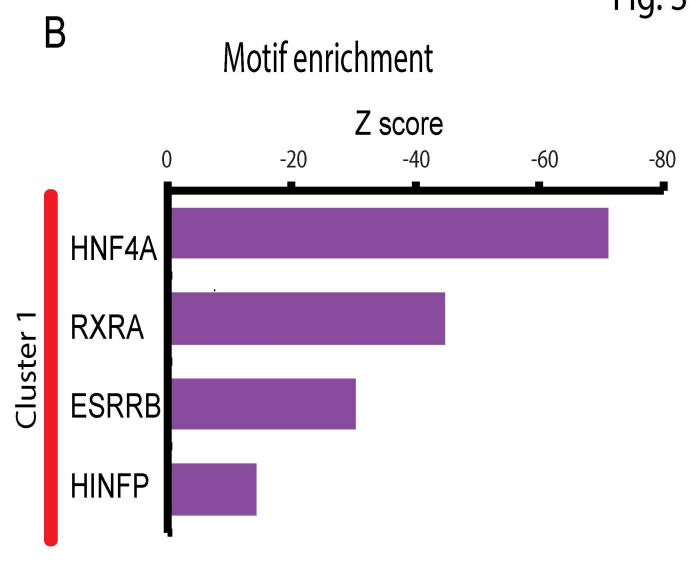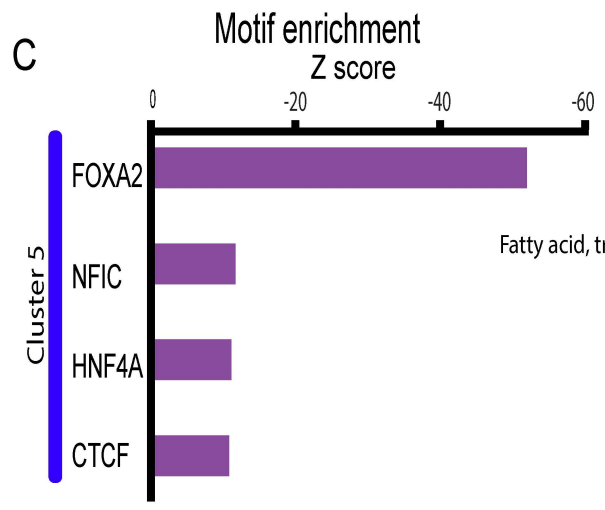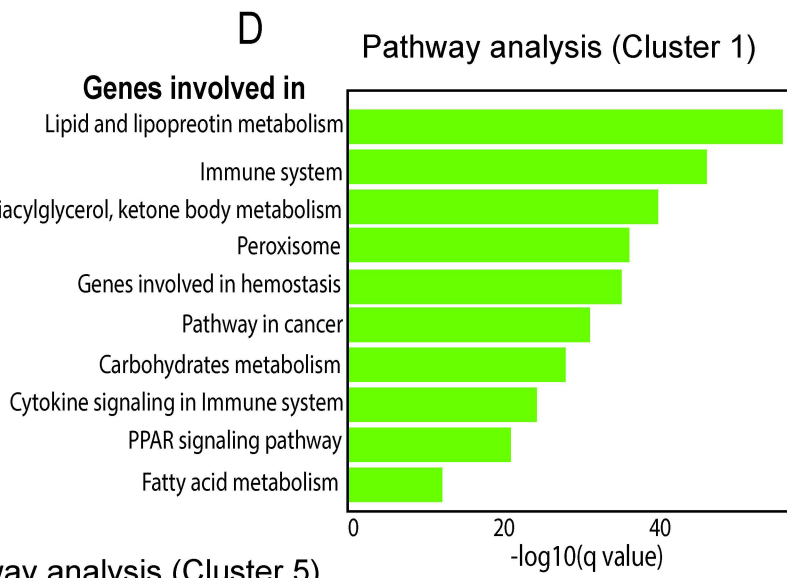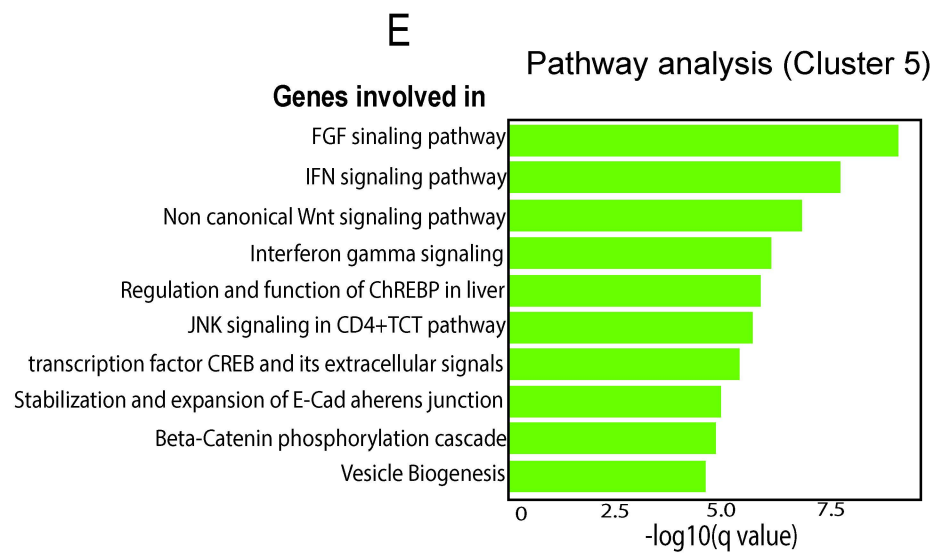

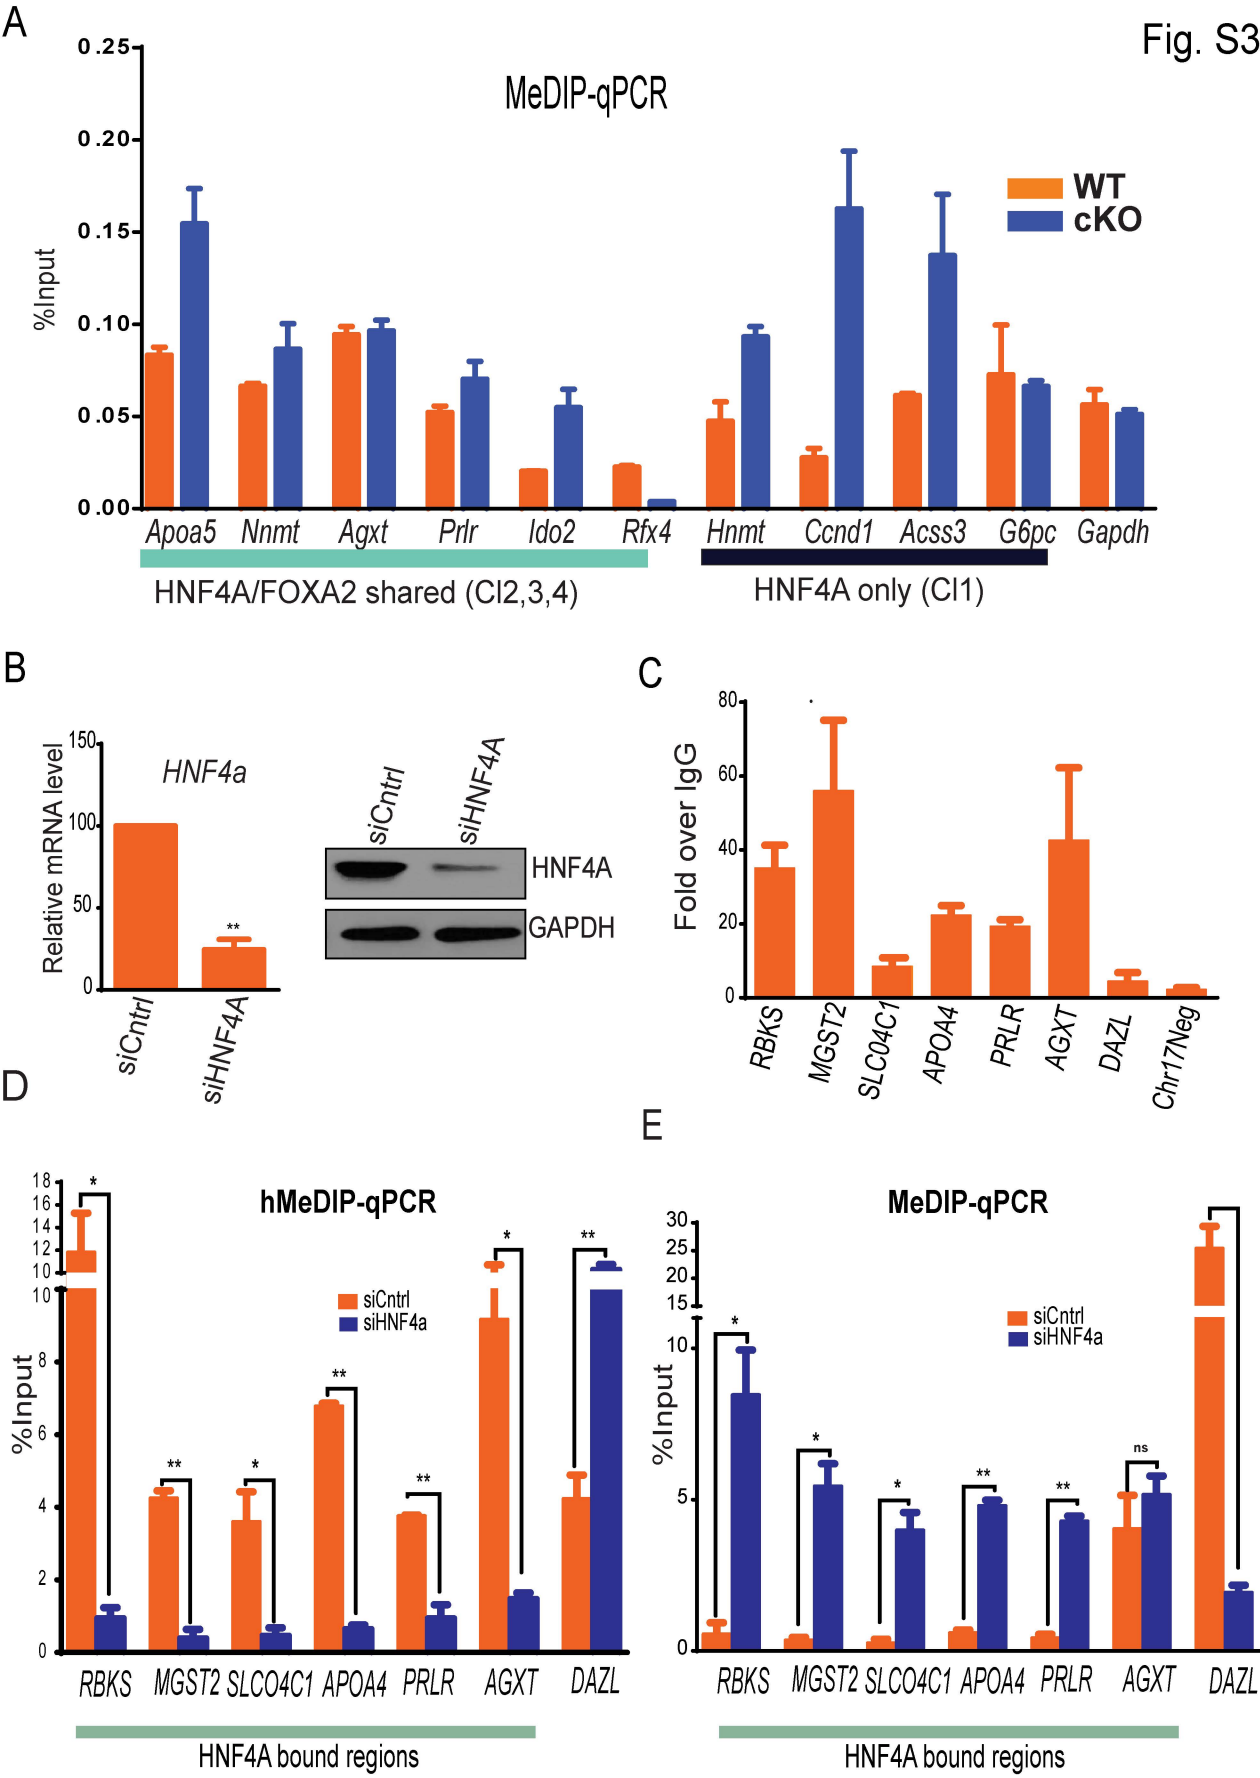

A

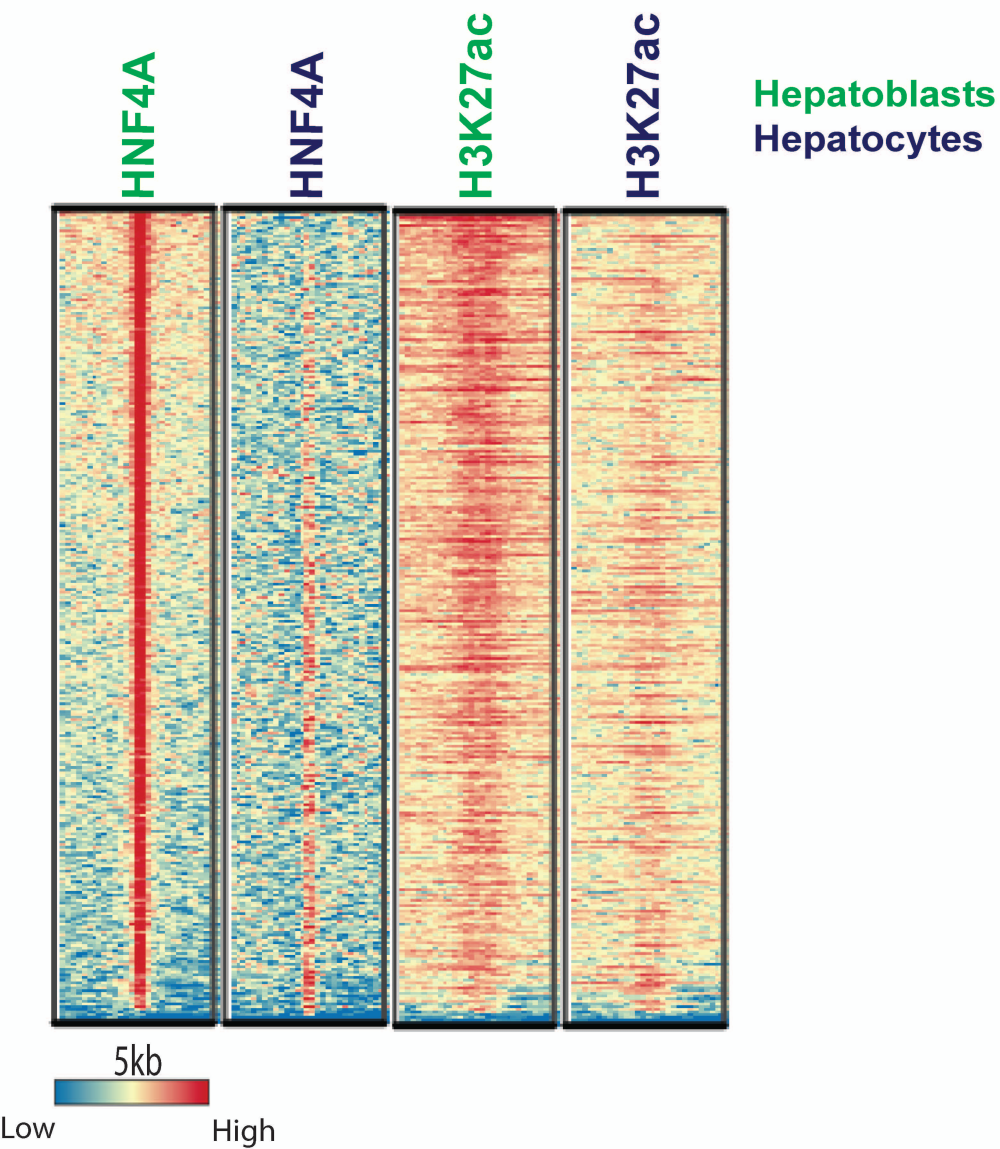

B

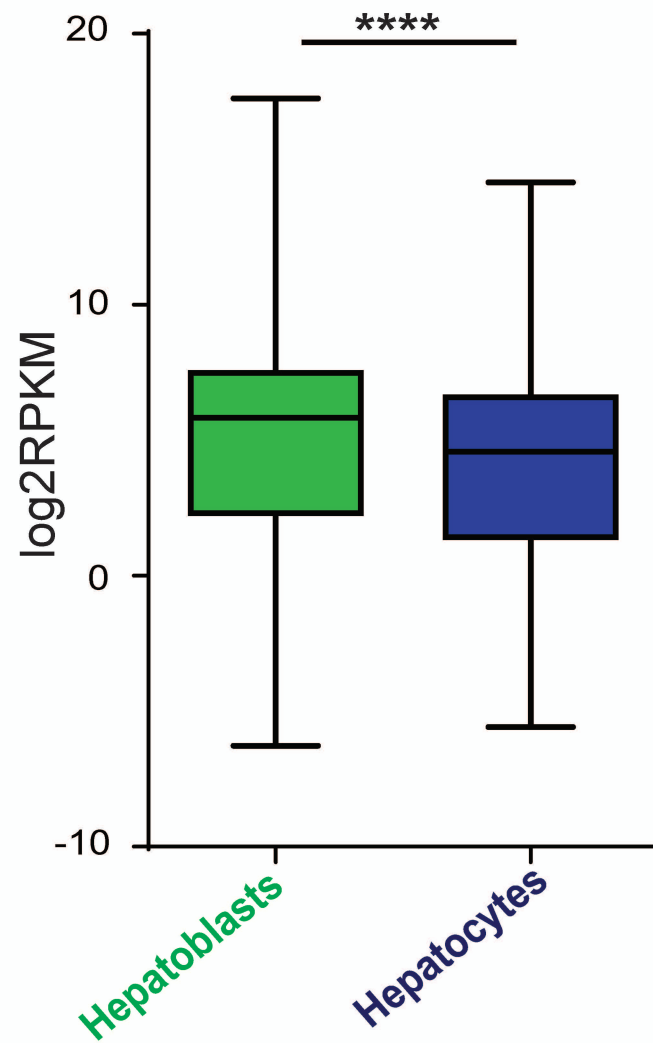

A

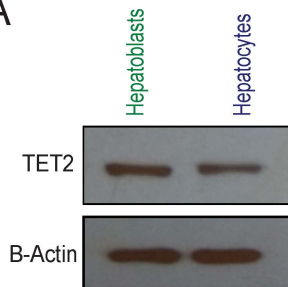

B

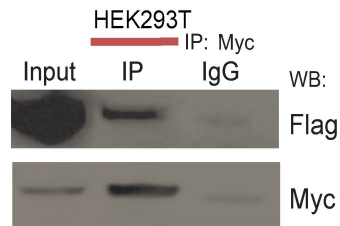

C

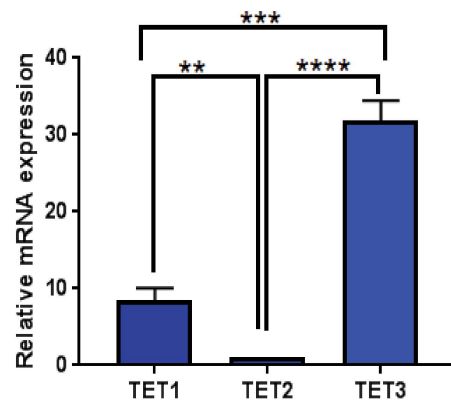

D

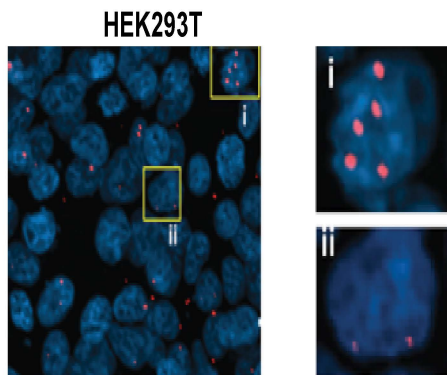

E

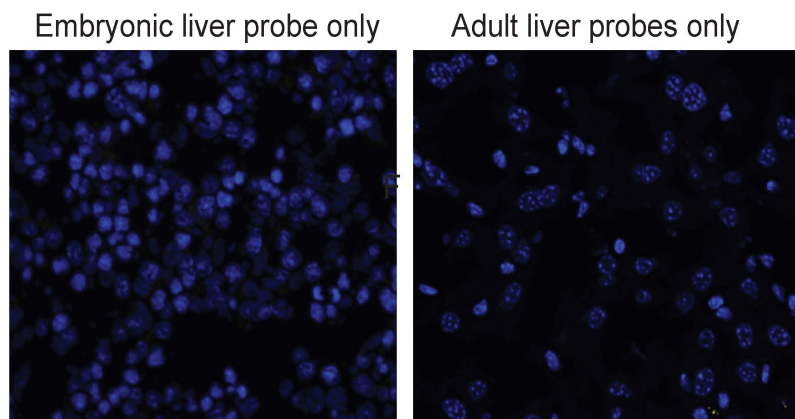

A

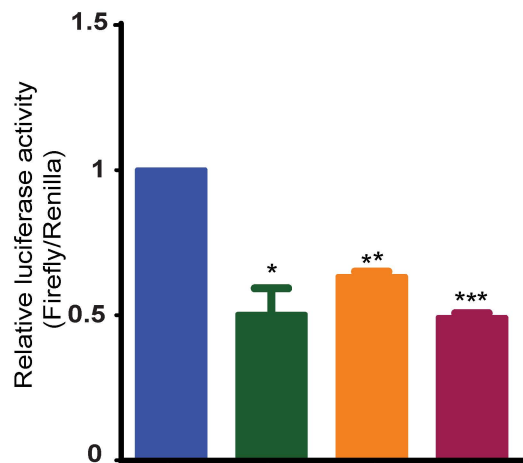

|                     |   |   |   |   |
|---------------------|---|---|---|---|
| PGL3-EIBP-mTET3     | + | - | - | - |
| PGL3-EIBP-mTET3Δ1   | - | + | - | - |
| PGL3-EIBP-mTET3Δ2   | - | - | + | - |
| PGL3-EIBP-mTET3Δ1Δ2 | - | - | - | + |
| PDGT-HNF4A          | + | + | + | + |

B

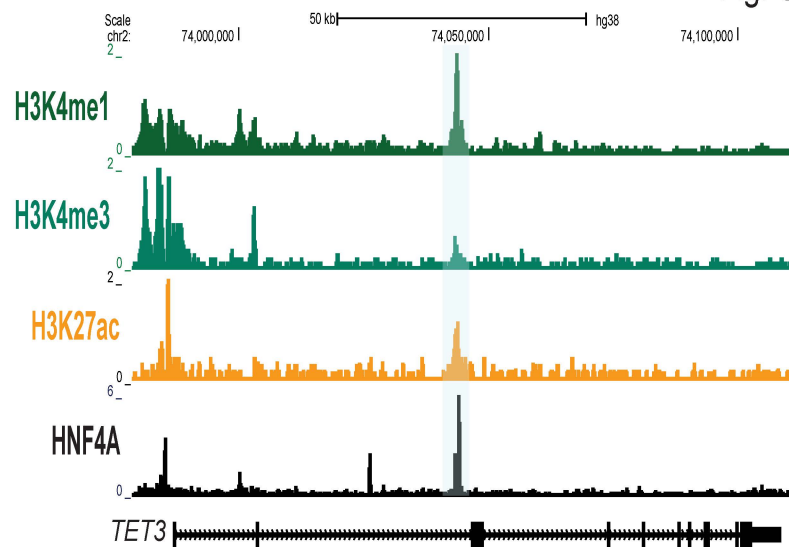

C

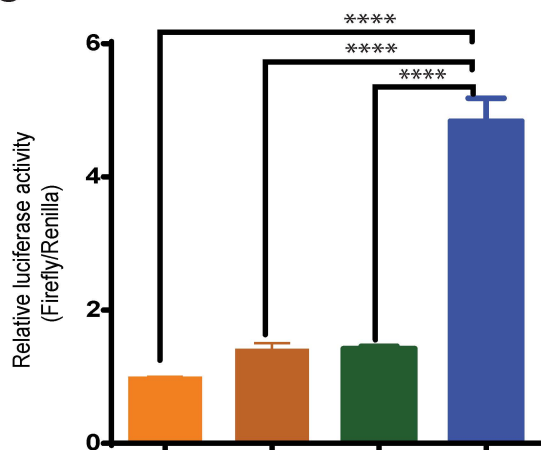

|                  |   |   |   |   |
|------------------|---|---|---|---|
| PGL3-EIBP-Empty  | + | - | + | - |
| PGL3-EIBP-hTET3E | - | + | - | + |
| PDGT-Empty       | + | + | - | - |
| PDGT-HNF4A       | - | - | + | + |

D

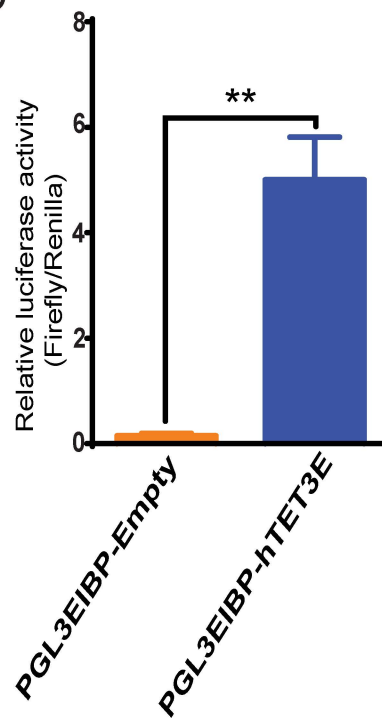

## 1 SUPPLEMENTARY MATERIALS AND METHODS

### 2 Cell culture and reagents

3 HepG2 and HEK293T cells were purchased from American Type Culture Collection (Manassas,  
4 VA). Cells were grown in DMEM media (STEMCELL Technologies) supplemented with 10%  
5 fetal bovine serum (Gibco). HPPL cells were generated and maintained as previously described  
6 <sup>(1)</sup>. All cells were maintained in a humidified incubator at 37°C and 5% CO<sub>2</sub>. For knockdowns,  
7 cells were seeded on 6 well plates and transfected with HNF4A and TET3 siRNA (Dharmacon)  
8 using RNAiMAX (ThermoFisher) for 72 hrs. siRNA used in this study are presented in Table S2.

9

### 10 Bioinformatic analysis

11 **ChIP-seq analysis:** Single-end ChIP-seq and corresponding DNA Input short read sequence  
12 data from multiple sources with read lengths ranging 27bp to 50bp were uniformly processed to  
13 generate genome-wide wiggle-format files

14 (<https://genome.ucsc.edu/FAQ/FAQformat.html#format6>) and bigWig files for further analysis  
15 and visualization with the help of UCSC genome browser. First, short reads were aligned to  
16 mm10 (NCBI build 38) mouse reference genome using BWA aligner (v.0.5.9) 'aln' and 'samse'  
17 options. Duplicated reads are marked by Picard (Picard tools 1.52) and collapsed (only one  
18 copy of the reads from a collection of the reads that have the same alignment position is  
19 retained). Reads mapped to the multiple locations are removed by applying alignment quality  
20 threshold QA>5. The average DNA fragment length was evaluated for both ChIP-Seq and DNA  
21 Input using self-correlation technique. Then, for each library the fragment coverage genomic  
22 profile was calculated using directional extension of all aligned reads with estimated average  
23 fragment length (in the range 150-200bp). Further a custom BAM2WIG java tool

24 (<http://www.epigenomes.ca/tools-and-software>, M. Bilenky, unpublished) was used to generate  
25 UCSC browser wig files. 'wigToBigWig' program from UCSC tools suit

26 ([http://hgdownload.soe.ucsc.edu/downloads.html#source\\_downloads](http://hgdownload.soe.ucsc.edu/downloads.html#source_downloads)) was used to convert wig

27 files into bigwig files <https://genome.ucsc.edu/goldenPath/help/bigWig.html>). ENCODE adult  
28 mouse liver was downloaded from <https://www.encodeproject.org/experiments/>  
29 **hmeDIP-seq/meDIP-seq analyses:** Sequencing reads were aligned to mm10 using Burrows-  
30 Wheeler Aligner (BWA, version 0.5.7) <sup>(2)</sup> and converted to BAM format using Samtools (version  
31 0.1.19) <sup>(3)</sup>. PCR duplicates were marked using Picard (version 1.52). Deeptools bamCoverage  
32 (version 2.5.0.1) <sup>(4)</sup> was used to normalize library coverage to RPKM based on bin sizes of  
33 20bp, and the resulting BIGWIG file was used for downstream analyses and visualization. BWA  
34 mapping quality scores less than 5 were discarded and duplicate reads were only counted once.  
35 Heatmaps and K-means clustering were generated using ChAsE <sup>(5)</sup>. CEAS <sup>(6)</sup> determined  
36 genomic distribution. Profile plots of histone modifications and DNA modifications were  
37 generated using SitePro within the Galaxy/Cistrome toolbox <sup>(6)</sup>. Motif analysis was performed  
38 using SeqPos in Cistrome <sup>(7)</sup>. GREAT was used for gene association <sup>(8)</sup>. EMBL ENA accession  
39 number for the data reported in this paper is PRJEB31004.

40

#### 41 **MeDIP and hMeDIP-qPCR**

42 MeDIP and hMeDIP for locus-specific qPCR analysis were performed as described <sup>(9)</sup> with  
43 several modifications. DNA from mouse hepatocytes, hepatoblasts, whole livers (WT and  
44 HNF4A KO) and HepG2 cells was isolated using Quick DNA MiniPrep kit (Zymo Research). DNA  
45 was sonicated to achieve fragments size of 300-500bp. 800ng of sonicated DNA (40ul) was  
46 added to siliconized tubes, denatured at 95°C for 10 minutes, and cooled for 2 minutes on ice.  
47 Samples were incubated with 2µg of anti-5mC or anti-5hmC antibodies (Table S2) for 2 hours.  
48 Next, 20ul of Dynabeads™ Protein G (ThermoFisher Scientific) was added to samples and  
49 incubated for 4 hours at 4°C followed by three washes with 0.05% Triton X-100 in PBS. DNA  
50 was eluted by heating samples at 65°C for 10 minutes with elution buffer (1% SDS in TE). The  
51 total eluent was treated with proteinase K (Invitrogen) and RNase A (Invitrogen) overnight at  
52 55°C. DNA was purified by phenol-chloroform extraction. 3µl of enriched and input DNA were



53 used for qPCR using loci-specific primers (Table S1) to determine enrichment of target loci  
54 normalised to input.

55

## 56 **RNA sequencing**

57 We used our previously published RNA-seq data analysis pipeline as described <sup>(10)</sup>. RPKM  
58 values were used to generate box plots indicating global gene expression using GraphPad  
59 Prism software. For individual genes RPKM values were plot using Microsoft Excel.

60

## 61 **RT-qPCR:**

62 RNA was extracted from cells or tissues using TRIzol (Invitrogen). cDNA was synthesized using  
63 Transcriptor First Strand cDNA synthesis kit (Roche). qRT-PCR was carried out using the SYBR  
64 Green Master Mix (Roche) on the StepOnePlus Real-Time PCR System (Applied Biosystems).  
65 Relative mRNA quantification was calculated using Ct values ( $2^{-\Delta\Delta Ct}$ ). mRNA expression levels  
66 were normalised to *Gapdh* or  *$\beta$ -actin*. RT-qPCR primers are presented in Table S1.

67

## 68 **Western blot**

69 Cells were lysed with ice-cold lysis buffer (Cell Signalling Technology) with added protease  
70 inhibitor cocktail (Sigma Aldrich). Proteins were quantified using the Pierce BCA Protein Assay  
71 kit (Thermo Fisher Scientific). An equal amount of protein was loaded onto SDS-polyacrylamide  
72 gels and transferred onto PVDF membranes. After blocking for one hour with 5% non-fat milk in  
73 TBS, membranes were incubated with primary antibodies overnight at 4°C (Table S2). The  
74 membranes were washed with TBS and incubated with HRP-conjugated secondary antibodies  
75 at room temperature for 1 hour. HRP activity was detected with Pierce ECL Western Blotting  
76 Substrate (Thermo Fisher Scientific). Antibodies used for westerns are listed in Table S2.

77

## 78 **Luciferase assay**

79 Enhancer regions were PCR amplified and clones in PGL3 basic vector under the control of EIB  
80 promoter. HNF4A binding motifs were deleted using site-directed mutagenesis. Luciferase  
81 constructs with RLTK (Promega) were transfected using PEI and lipofectamine in HEK293T  
82 and HepG2 cells respectively. Cells were harvested 48 hours post-transfection and luciferase  
83 assays were performed using the Dual-Luciferase Reporter System (Promega) and presented  
84 as Firefly/Renilla ratio. Primers used for enhancer cloning and mutagenesis are listed in Table  
85 S1.

86

## 87 REFERENCES

- 88 1. Tanimizu N, Saito H, Mostov K, Miyajima A. Long-term culture of hepatic progenitors  
89 derived from mouse Dlk+ hepatoblasts. *J. Cell Sci.* 2004;117:6425–6434.
- 90 2. Li H, Durbin R. Fast and accurate short read alignment with Burrows-Wheeler transform.  
91 *Bioinformatics.* 2009;25:1754–1760.
- 92 3. Li H, Handsaker B, Wysoker A, Fennell T, Ruan J, Homer N, et al. The Sequence  
93 Alignment/Map format and SAMtools. *Bioinformatics.* 2009;25:2078–2079.
- 94 4. Ramírez F, Ryan DP, Grüning B, Bhardwaj V, Kilpert F, Richter AS, et al. deepTools2: a  
95 next generation web server for deep-sequencing data analysis. *Nucleic Acids Res.*  
96 2016;44:W160–W165.
- 97 5. Younesy H, Nielsen CB, Lorincz MC, Jones SJM, Karimi MM, Möller T. ChAsE:  
98 chromatin analysis and exploration tool. *Bioinformatics.* 2016;32:3324–3326.
- 99 6. Shin H, Liu T, Manrai AK, Liu XS. CEAS: cis-regulatory element annotation system.  
100 *Bioinformatics.* 2009;25:2605–2606.
- 101 7. He HH, Meyer CA, Shin H, Bailey ST, Wei G, Wang Q, et al. Nucleosome dynamics  
102 define transcriptional enhancers. *Nat. Genet.* 2010;42:343–347.
- 103 8. McLean CY, Bristol D, Hiller M, Clarke SL, Schaar BT, Lowe CB, et al. GREAT improves  
104 functional interpretation of cis-regulatory regions. *Nat. Biotechnol.* 2010;28:495–501.

- 105 9. Deplus R, Delatte B, Schwinn MK, Defrance M, Méndez J, Murphy N, et al. TET2 and  
106 TET3 regulate GlcNAcylation and H3K4 methylation through OGT and SET1/COMPASS.  
107 EMBO J. 2013;32:645–655.
- 108 10. Alder O, Cullum R, Lee S, Kan AC, Wei W, Yi Y, et al. Hippo signaling influences HNF4A  
109 and FOXA2 enhancer switching during hepatocyte differentiation. Cell Rep. 2014;9:261–  
110 271.
- 111

## SUPPLEMENTARY TABLES

**Table S1: PRIMERS USED**

|                        |                | <b>ChIP, MeDIP and hMeDIP-qPCR</b> |                          |
|------------------------|----------------|------------------------------------|--------------------------|
| <b>Name</b>            | <b>Species</b> | <b>Forward 5'to 3'</b>             | <b>Reverse 5' to 3'</b>  |
| <b><i>Cdc42bpb</i></b> | Mouse          | GAGTTCCTTCTGGGCCGTAA               | CCTGCGCAGACCTTGAAATC     |
| <b><i>Mgst3</i></b>    | Mouse          | AACTCGAAGTGGGACAAGGG               | GCAAGTGGAGCGGGAAAATC     |
| <b><i>Tet3</i></b>     | Mouse          | GATCCCAGGCCAACTCCAAA               | ATCTACCGATCTGGCTCCCT     |
| <b><i>Ido2</i></b>     | Mouse          | CGAGGAGCAAAGTTCATAGAGACAC          | TTGGGAAAGAACAGTGGGTTTGGC |
| <b><i>Rfx4</i></b>     | Mouse          | ACAGGAGCCAGGAAAGGAACAGAA           | AGGCATGCTTTGTTTAGCCTGAGC |
| <b><i>Tbx15</i></b>    | Mouse          | TCCCCCTTCTCTGTGTCAG                | CGGAAGCAAGTCTCAGATCC     |
| <b><i>IGd</i></b>      | Mouse          | CCCTCTGGCCCTGAATTTAT               | CACCCAGCAATGCTTCAGT      |
| <b><i>Dazl</i></b>     | Mouse          | CTAAGGCCTGCTCCTACGG                | AGCACAGAGAAGTGGGGAGA     |
| <b><i>Apoa5</i></b>    | Mouse          | ACCCAAATCAATCCTCCCTCCTCT           | ACTTGCAGGCATTCTCCAGTCTCT |
| <b><i>Nnmt</i></b>     | Mouse          | ACCCTCATTACATGGCTTGTGACC           | GCAGTGGGCAGAACATCCAAAGAA |
| <b><i>Agxt</i></b>     | Mouse          | ATCAGCAAGTGAAGGCCACGAAAC           | TGCAACTTGAGAAGCTGGCCATTG |
| <b><i>Prlr</i></b>     | Mouse          | TCCCTTCATCTCGTCGGTGTGTTGA          | GCGGTATCATTGCTGTGTGGCATT |
| <b><i>Hnmt</i></b>     | Mouse          | GTACAGCCAGCACAAGACCA               | ACCATCCATCGAGGAATCAC     |
| <b><i>Ccnd1</i></b>    | Mouse          | TCCAGAAGGGCTTCAATCTG               | CTGGCAGCTCTCACTGGATT     |
| <b><i>Acss3</i></b>    | Mouse          | TCAAAATTGAGGATGCGATG               | GGGAAAGAGGGGAGAGTGTT     |
| <b><i>G6pc</i></b>     | Mouse          | TCCAAGAGCTGACATCCTCAC              | TCCCACCACGTGGGTATTGA     |
| <b><i>Gapdh</i></b>    | Mouse          | GGGTTGAATTGGAGGAGGCT               | GAAAGGGGCAGTGTCTCCTA     |
| <b><i>Six1</i></b>     | Mouse          | CTATCTTTGTGCCGGGTGTT               | GGTCCCATTCTCCCTTGTTA     |
| <b><i>RBKS</i></b>     | Human          | AGTAACTGGCCCCGGACTAA               | AGGAGTGGCGTCTCTGGTTA     |

|                        |       |                                 |                             |
|------------------------|-------|---------------------------------|-----------------------------|
| <b><i>MGST2</i></b>    | Human | TGCTCTGATCCCAGTCAGTG            | TGCTTCTTGCAGGTTTTCTGT       |
| <b><i>SLCO4C1</i></b>  | Human | GGTGCTTCAGAGCAGCAGA             | CTGCGAGCTGGAGTAGGAAG        |
| <b><i>APOA4</i></b>    | Human | CCCAGCAACTCAATGCCCT             | CCTTCAGTTTCTCCGAGTCCT       |
| <b><i>PRLR</i></b>     | Human | CGCCATGGGTACTCACTTTT            | GCACCGAGTTGAGCTTCTTC        |
| <b><i>AGXT</i></b>     | Human | CTGCAGTCCCAATCTCACCT            | GACTTCTCCCCGAAGTCCTC        |
| <b><i>DAZL</i></b>     | Human | CTCCTTTGACCACTCGAAGC            | CACCCACGAGTGAAGACTCC        |
| <b><i>Chr17Neg</i></b> | Human | GCAGGCACATAAGGGTGTTT            | CCGTGTTAGCCAAGATGGTC        |
|                        |       | <b>Primers used for qRT-PCR</b> |                             |
| <b><i>Tet3</i></b>     | Mouse | CAAACCACCCAAGGAAAAGA            | CCTGGACCTGGATTCTTGA         |
| <b><i>Hnf4a</i></b>    | Mouse | AGCGTGAGGAAGAACCACAT            | AGCCCGGAAGCACTTCTTA         |
| <b><i>Gapdh</i></b>    | Mouse | AGGTCGGTGTGAACGGATTTG           | TGTAGACCATGTAGTTGAGGTCA     |
| <b><i>B-Actin</i></b>  | Mouse | GGCTGTATTCCCCTCCATCG            | CCAGTTGGTAACAATGCCATGT      |
| <b><i>HNF4A</i></b>    | Human | CGAAGGTCAAGCTATGAGGACA          | ATCTGCGATGCTGGCAATCT        |
| <b><i>TET1</i></b>     | Human | CAGAACCTAAACCACCCGTG            | TGCTTCGTAGCGCCATTGTAA       |
| <b><i>TET2</i></b>     | Human | GATAGAACCAACCATGTTGAGGG         | TGGAGCTTTGTAGCCAGAGGT       |
| <b><i>TET3</i></b>     | Human | TCCAGCAACTCCTAGAACTGAG          | AGGCCGCTTGAATACTGACTG       |
| <b><i>BACTIN</i></b>   | Human | TCCCTGGAGAAGAGCTACGA            | AGCACTGTGTTGGCGTACAG        |
|                        |       | <b>Cloning and mutagenesis</b>  |                             |
| <b><i>mTET3E</i></b>   | Mouse | CGACGCGTTTCTCGGGAACAGGCAGTGG    | CCGCTCGAGTAAGTCCACACCACCTGA |
| <b><i>mTET3EΔ1</i></b> | Mouse | GGATCAAGGCGGGAGGGGAG            | CTCCCCTCCCGCCTTGATCC        |
| <b><i>mTET3EΔ2</i></b> | Mouse | GGGTCCATAGCACAGGCAGA            | TCTGCCTGTGCTATGGACCC        |
| <b><i>hTET3E</i></b>   | Human | CCGGAGCTCTCATTTGAGGCCAGAAGT     | CCGCTCGAGGGGTATGTGAAGTCCCAA |

**Table S2: ANTIBODIES, siRNA AND PLA PROBES**

| <b>Antibodies used</b>                  |                             |                  |                |                                       |
|-----------------------------------------|-----------------------------|------------------|----------------|---------------------------------------|
| <b>Antibody</b>                         | <b>Company</b>              | <b>Catalogue</b> | <b>Species</b> | <b>Application</b>                    |
| <b>Anti-5-Methylcytosine Antibody</b>   | Eurogentec                  | BI-MECY-1000     | Mouse          | MeDIP-sequencing                      |
| <b>5-Hydroxymethylcytosine antibody</b> | Active Motif                | 39769            | Rabbit         | hMeDIP-sequencing                     |
| <b>Anti-5-Methylcytosine Antibody</b>   | Epigentek                   | A1014            | Mouse          | MeDIP-qPCR                            |
| <b>5-Hydroxymethylcytosine Antibody</b> | Active Motif                | 39769            | Rabbit         | hMeDIP-qPCR                           |
| <b>H3K27ac</b>                          | Abcam                       | ab4729           | Rabbit         | ChIP-seq and ChIP-qPCR                |
| <b>TET3</b>                             | GeneTex                     | 121453           | Rabbit         | Western Blot/PLA                      |
| <b>TET2</b>                             | Active Motif                | 6389             | Rabbit         | Western Blot                          |
| <b>HNF4A</b>                            | Santa Cruz                  | SC-8987          | Rabbit         | ChIP-seq/ChIP-qPCR/CO-IP/Western Blot |
| <b>HNF4A</b>                            | Santa Cruz                  | SC-6556          | Goat           | Co-IP/Western Blot/PLA                |
| <b>Myc</b>                              | COVANCE                     | MMS-150P         | Mouse          | Co-IP/Western Blot/PLA                |
| <b>Myc</b>                              | Sigma                       | C3956            | Rabbit         | Co-IP/Western Blot/PLA                |
| <b>Flag</b>                             | Sigma                       | F3165            | Mouse          | Co-IP/Western Blot/PLA                |
| <b>Flag</b>                             | Sigma                       | F7425            | Rabbit         | Co-IP/Western Blot/PLA                |
| <b>Normal Mouse IgG</b>                 | Santa Cruz<br>Biotechnology | sc-2025          | Mouse          | Co-IP                                 |

|                                                      |                             |                      |        |                 |
|------------------------------------------------------|-----------------------------|----------------------|--------|-----------------|
| <b>Normal Rabbit IgG</b>                             | Santa Cruz<br>Biotechnology | sc-2027              | Rabbit | Co-IP/ChIP-qPCR |
| <b>siRNA used</b>                                    |                             |                      |        |                 |
| <b>Name</b>                                          | <b>Company</b>              | <b>Catalogue</b>     |        |                 |
| <b>ON-TARGETplus Non-targeting<br/>siRNA</b>         | Dharmacon                   | D-001810-<br>01-055  |        |                 |
| <b>ON-TARGETplus Human HNF4A<br/>siRNA-SMARTpool</b> | Dharmacon                   | L-003406-<br>00-0005 |        |                 |
| <b>ON-TARGETplus Human TET3<br/>siRNA-SMARTpool</b>  | Dharmacon                   | L-022722-02          |        |                 |
| <b>ON-TARGETplus Mouse HNF4A<br/>siRNA-SMARTpool</b> | Dharmacon                   | L-065463-00          |        |                 |
| <b>ON-TARGETplus Mouse Tet3-<br/>siRNA-SMARTpool</b> | Dharmacon                   | L-054156-01          |        |                 |
| <b>PLA probes used</b>                               |                             |                      |        |                 |
| <b>Name</b>                                          | <b>Company</b>              | <b>Catalogue</b>     |        |                 |
| <b>Anti mouse Plus</b>                               | Sigma/Duolink               | DUO92001             |        |                 |
| <b>Anti Rabbit minus</b>                             | Sigma/Duolink               | DUO92005             |        |                 |
| <b>Anti Goat Plus</b>                                | Sigma/Duolink               | DUO92003             |        |                 |
